# Supplementary material for: A Recurrence‐Specific Gene‐Based Prognosis Prediction Model for Lung Adenocarcinoma through Machine Learning Algorithm
Source: Hindawi journal article supplement (doi:10.1155/2020/9124792), 2020-01-01
Supplement: f1 [file 9124792.f1.zip]

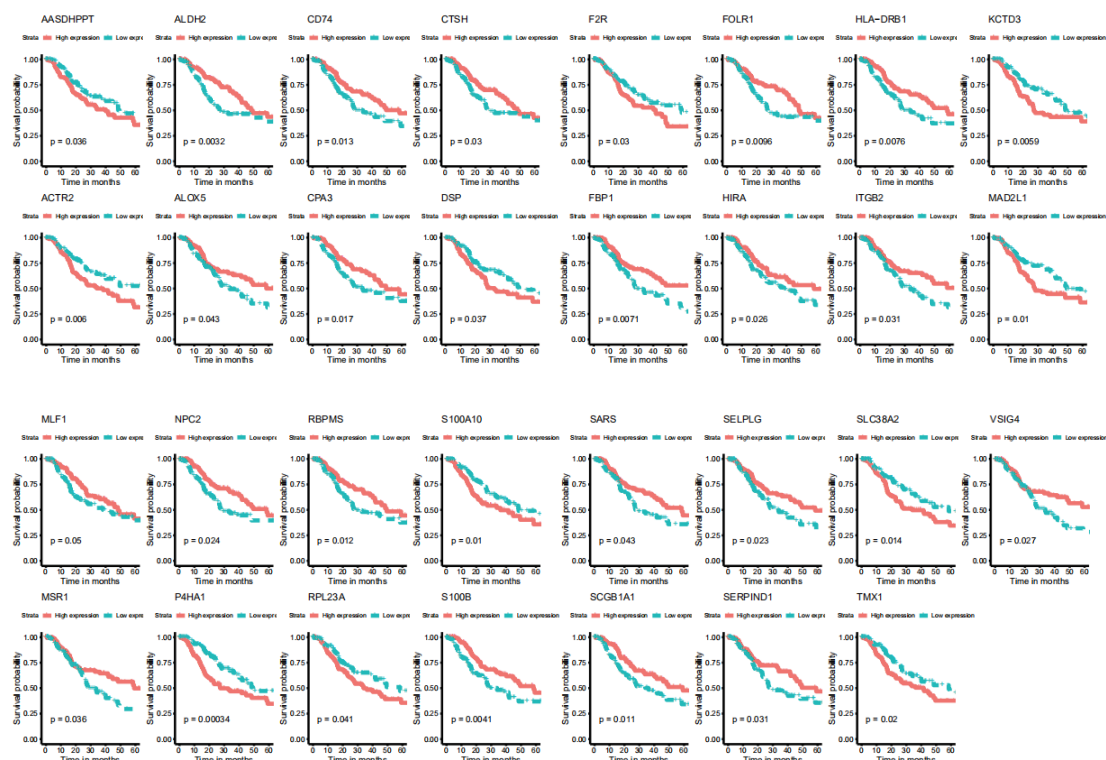

**Figure S1. Univariate Cox regression analysis to screen out the recurrence-free survival-related differentially expressed genes.**

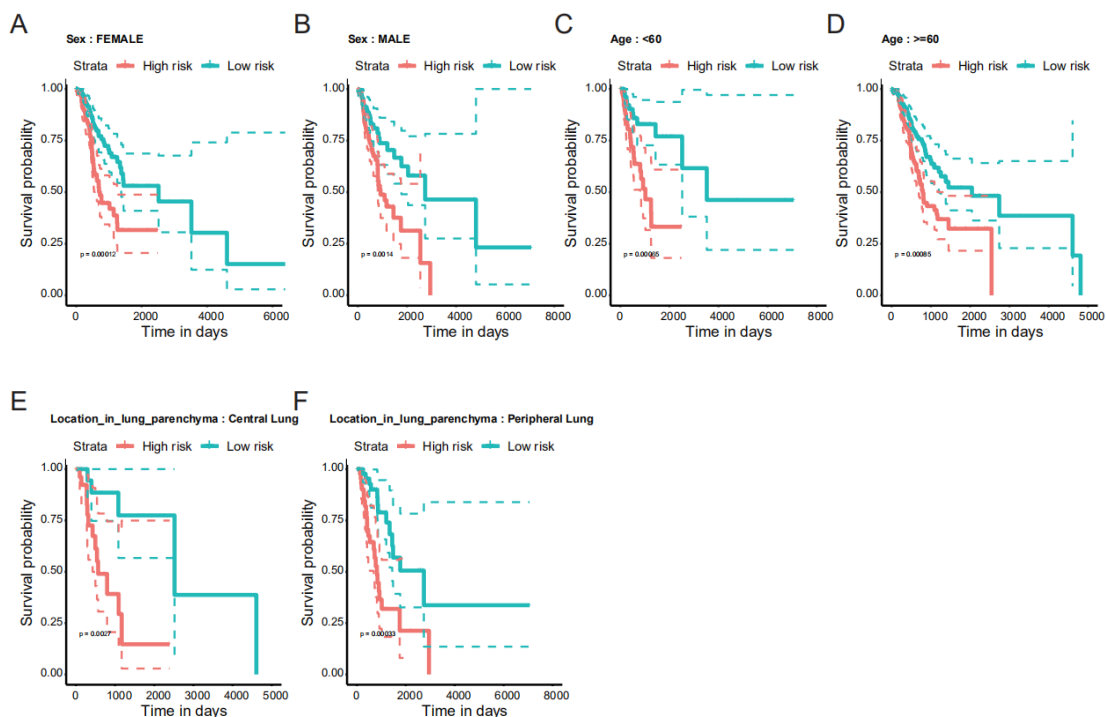

**Figure S2. Efficiency of prediction model under different clinical subgroups**

The K-M curve confirmed that the signature could significantly distinguish low- and high-risk groups in the sex subgroups (A and B), age subgroups (C and D) and location in lung parenchyma subgroups (E and F).
