# Supplementary material for: A Recurrence-Specific Gene-Based Prognosis Prediction Model for Lung Adenocarcinoma through Machine Learning Algorithm
Source: Biomed Res Int. 2020 Nov 7;2020:9124792. doi: 10.1155/2020/9124792 (PMC7669350; doi:10.1155/2020/9124792)
Supplement: Supplementary Materials — Figure S1: univariate Cox regression analysis to screen out the recurrence-free survival-related differentially expressed genes. Figure S2: efficiency of prediction model under different clinical subgroups. The K-M curve confirmed that the signature could significantly distinguish low- and high-risk groups in the sex subgroups (A and B), age subgroups (C and D), and location in lung parenchyma subgroups (E and F). Table S1: differential expressed genes between recurrent and primary LUAD. Table S2: differential expressed genes between high and low risks of LUAD patients of TCGA. [file 9124792.f1.zip › Table S1 (1).xlsx]

## Sheet: Sheet1
Table S1. Differential expressed genes between recurrent and primary LUAD.
Gene_Symbol	logFC	AveExpr	t	P.Value	adj.P.Val	B
C3	-1.42328	7.85063	5.32219	1.32601e-05	0.056223	3.00412
ALDH2	-1.04473	7.27784	5.02091	2.96285e-05	0.0638096	2.32112
TCEA2	-0.590029	4.80824	4.94208	3.65791e-05	0.0638096	2.1415
RRAS	-0.621272	4.80086	4.88406	4.27187e-05	0.0638096	2.00912
CD63	-0.671931	9.48094	4.79363	5.44065e-05	0.0638096	1.80254
DCTN3	-0.646103	5.69484	4.65684	7.84327e-05	0.0665109	1.48965
LY86	-0.651394	5.74796	4.31703	0.000194166	0.094134	0.712223
SARS	-0.636463	6.75011	4.30626	0.000199813	0.094134	0.687602
S100B	-0.630764	3.50338	4.22994	0.000244727	0.096498	0.513408
UBXN1	-0.623253	6.45742	4.14958	0.000302848	0.107254	0.330273
RPS27	-0.815425	10.0744	4.11284	0.000333775	0.107254	0.246689
TMSB10	-0.784571	10.6733	4.10535	0.00034045	0.107254	0.229665
EDF1	-0.636692	6.41348	3.88076	0.000615053	0.134143	-0.278851
ANXA11	-0.659199	7.0664	3.86513	0.000640766	0.134143	-0.314062
LITAF	-0.611132	8.06514	3.85885	0.000651396	0.134143	-0.328207
HSD17B6	-0.736802	2.94303	3.82604	0.000709763	0.134143	-0.401978
LAMB2	-0.752435	4.83053	3.78615	0.000787686	0.139158	-0.491518
GADD45B	-1.04791	5.77672	3.74277	0.000881952	0.141994	-0.588664
SELPLG	-0.603718	5.1391	3.70885	0.000963278	0.141994	-0.664452
TNS1	-0.778025	1.50764	3.68626	0.00102145	0.146811	-0.714822
MCL1	-0.839329	8.63636	3.6642	0.00108158	0.152612	-0.763956
MSR1	-0.753319	3.50402	3.65845	0.0010978	0.152612	-0.776741
SNRPN	-0.637517	1.17149	3.59247	0.00130188	0.160273	-0.923141
RGS1	-1.32909	5.67138	3.55751	0.00142456	0.163247	-1.00043
TMEM176A	-0.874079	6.03191	3.49513	0.00167198	0.178466	-1.1378
BRD4	-0.773318	5.65638	3.49242	0.00168364	0.178466	-1.14376
TLR7	-0.590833	3.04017	3.45762	0.00184037	0.186483	-1.22007
CD74	-0.988774	9.04674	3.45391	0.00185788	0.186483	-1.22818
FOSB	-1.52698	4.88222	3.43241	0.00196266	0.189129	-1.2752
CTSH	-0.829251	7.5349	3.41365	0.00205872	0.192243	-1.31613
FCGBP	-1.26906	5.52161	3.36524	0.00232812	0.196851	-1.42143
TNFSF12-TNFSF13	-0.639345	6.1623	3.36467	0.00233149	0.196851	-1.42267
RBPMS	-0.808552	5.52824	3.35276	0.00240292	0.196851	-1.4485
RPL34	-0.641992	9.92628	3.32651	0.00256794	0.196851	-1.50532
TMEM258	-0.597773	8.73231	3.28817	0.00282875	0.212262	-1.58804
PRKD1	-0.621156	3.95142	3.27713	0.00290842	0.21364	-1.61178
RGS16	-0.714443	4.83732	3.21873	0.00336742	0.230809	-1.73694
ATP5O	-0.654154	7.80034	3.2178	0.00337529	0.230809	-1.73893
NCOR2	-0.603013	6.30692	3.17617	0.00374504	0.230809	-1.82762
HLA-E	-0.589486	7.05797	3.1614	0.00388533	0.230809	-1.85898
PROCR	-0.626376	3.81728	3.15623	0.00393558	0.230809	-1.86993
APOE	-1.10293	5.38596	3.14138	0.00408354	0.230809	-1.90139
DCXR	-0.669895	5.62533	3.13879	0.00410992	0.230809	-1.90688
GPR183	-0.593888	4.52792	3.12822	0.0042191	0.233843	-1.92921
CYR61	-1.04268	6.60767	3.11802	0.00432707	0.235215	-1.95073
DDX18	-0.688235	6.27889	3.11298	0.00438146	0.236654	-1.96137
CST3	-0.764982	7.19158	3.09304	0.00460287	0.237162	-2.00334
FOLR2	-0.633908	5.81625	3.09013	0.00463606	0.237162	-2.00945
CORIN	-0.614064	2.63583	3.08786	0.0046622	0.237162	-2.01424
COX6B1	-0.775116	7.47206	3.08716	0.00467024	0.237162	-2.0157
RPS23	-0.686718	10.4353	3.08713	0.00467052	0.237162	-2.01575
RPS15	-0.718289	10.3739	3.0462	0.00516597	0.245264	-2.1015
CAPG	-0.6133	5.49472	3.0441	0.00519276	0.245264	-2.1059
EGR2	-0.589286	4.56585	3.04341	0.0052016	0.245264	-2.10734
MIR6805	-0.723165	9.81243	3.03411	0.00532177	0.245264	-2.12675
SEZ6L2	-0.593428	3.93152	3.01761	0.00554142	0.247489	-2.16111
PCSK5	-0.931541	3.53218	2.99423	0.00586768	0.252602	-2.20968
JUN	-0.664677	3.67087	2.99392	0.00587208	0.252602	-2.21032
MRC2	-0.613798	6.26412	2.92598	0.0069276	0.267876	-2.35046
GNB2L1	-0.684266	9.12164	2.92106	0.00701061	0.267876	-2.36055
AK1	-0.598836	5.23914	2.91854	0.00705343	0.267876	-2.3657
PCOLCE2	-0.674489	3.24187	2.91104	0.00718269	0.267876	-2.38107
NBEAL1	-0.652997	9.8599	2.90991	0.00720232	0.267876	-2.38338
RPL7A	-0.603947	10.531	2.90746	0.00724516	0.268292	-2.3884
TAF10	-0.678403	6.97393	2.90103	0.00735852	0.27001	-2.40154
KRT7	-0.970528	6.98005	2.88575	0.00763495	0.270208	-2.43274
NDUFB1	-0.696916	7.446	2.88217	0.00770117	0.270208	-2.44004
RPS15A	-0.613136	10.542	2.8725	0.00788257	0.270598	-2.45972
SAP18	-0.681513	7.51296	2.86752	0.00797753	0.270598	-2.46984
CXCL2	-1.40233	5.64689	2.83556	0.00861356	0.276227	-2.53463
CEBPB	-0.656821	8.37846	2.8326	0.00867469	0.276227	-2.5406
CD14	-0.896363	6.54388	2.82838	0.00876286	0.276227	-2.54913
CX3CR1	-0.779304	4.14632	2.81725	0.00899915	0.276227	-2.57158
SH3BGRL3	-0.624498	6.27257	2.81197	0.00911336	0.276994	-2.58222
SERPING1	-0.793988	6.30867	2.77901	0.0098576	0.281118	-2.64838
SFTPD	-1.34997	5.73441	2.77139	0.0100376	0.281118	-2.66361
ITGB2	-0.754282	6.56138	2.76982	0.0100751	0.281118	-2.66676
RPL12	-0.612036	10.1058	2.76625	0.0101608	0.281118	-2.67388
VSIG4	-0.947768	5.96061	2.76353	0.0102267	0.281439	-2.67932
HYAL1	-0.651425	4.33075	2.73386	0.0109704	0.288561	-2.73837
RPL23A	-0.595714	10.9587	2.72174	0.0112885	0.292742	-2.76239
CD99	-0.642245	8.31989	2.69734	0.0119556	0.293172	-2.8106
SELENBP1	-0.836577	5.75222	2.68536	0.0122963	0.293172	-2.83417
CEBPD	-0.945234	7.38346	2.68358	0.0123477	0.293172	-2.83767
TST	-0.59935	6.20807	2.68053	0.0124364	0.293172	-2.84367
ZFP36	-0.835904	6.0925	2.67675	0.012547	0.293172	-2.85109
DAPK1	-0.744584	5.84346	2.67474	0.0126061	0.293172	-2.85503
FOLR1	-1.09106	5.87385	2.67446	0.0126143	0.293172	-2.85558
SRGN	-0.592182	7.25841	2.67407	0.012626	0.293172	-2.85635
BLVRB	-0.619122	6.11059	2.6739	0.0126308	0.293172	-2.85667
GNG5	-0.70389	7.96819	2.65105	0.0133234	0.294851	-2.9014
LOC101928916	-1.05245	7.65906	2.64277	0.0135829	0.294851	-2.91755
SERPINA1	-1.29157	7.66109	2.60111	0.0149621	0.307959	-2.99841
FBP1	-0.860265	5.94119	2.57512	0.0158875	0.311866	-3.0485
PDXK	-0.671962	6.10012	2.56754	0.0161672	0.314773	-3.06305
CFI	-0.683902	5.8611	2.56538	0.0162481	0.314773	-3.06721
CASP4	-0.60096	4.87074	2.56197	0.0163756	0.315458	-3.07373
PDGFRL	-0.826034	4.62686	2.5559	0.0166059	0.315537	-3.08536
EGR3	-0.611903	2.78661	2.55228	0.0167443	0.315537	-3.09228
CD69	-0.676588	3.18375	2.54629	0.016976	0.317085	-3.10373
CD47	-0.798924	7.01888	2.54331	0.0170926	0.317734	-3.10943
LGALS3BP	-0.624334	6.99889	2.54253	0.0171232	0.317734	-3.11091
IER3	-0.655045	7.60896	2.5189	0.0180739	0.323872	-3.15587
ERAP2	-1.03683	4.27596	2.51873	0.0180808	0.323872	-3.15619
RAP1GAP	-0.673233	4.14525	2.51823	0.0181015	0.323872	-3.15714
C1QB	-0.88033	6.40998	2.51698	0.0181532	0.323872	-3.15951
CDA	-0.708266	4.22592	2.51051	0.0184231	0.323872	-3.17178
HLA-DRB1	-0.606004	4.79015	2.49112	0.0192539	0.326732	-3.20841
SQRDL	-0.609592	7.4815	2.48819	0.0193828	0.326732	-3.21395
C1S	-0.713811	7.45307	2.48235	0.0196413	0.328518	-3.22494
NPC2	-0.643435	9.03441	2.45854	0.0207289	0.335562	-3.26962
COL1A1	-1.05324	7.89766	2.45365	0.0209589	0.335976	-3.27876
AOC1	-0.763082	3.76468	2.44901	0.021179	0.336916	-3.28741
LGALS1	-0.688493	8.76228	2.44824	0.0212162	0.336916	-3.28886
MEOX2	-0.651054	1.80873	2.43874	0.0216751	0.340111	-3.30657
CTSE	-1.41805	5.64653	2.42511	0.0223494	0.340331	-3.33191
SLC39A8	-0.686737	5.36656	2.4249	0.0223596	0.340331	-3.33229
TYROBP	-0.623879	6.0023	2.4248	0.0223648	0.340331	-3.33248
HTRA1	-0.697278	6.91505	2.4241	0.0224	0.340331	-3.33378
LOXL1	-0.686121	5.11096	2.41487	0.0228682	0.340791	-3.35087
VCAN	-0.826006	7.32448	2.38696	0.0243402	0.348657	-3.40235
NRIP1	-0.892987	3.37208	2.37898	0.024777	0.349214	-3.41701
IFITM2	-0.658364	8.3415	2.3714	0.0251982	0.351255	-3.4309
TGFB1I1	-0.60363	5.01901	2.36894	0.0253359	0.351635	-3.43539
HEPH	-0.612612	4.42173	2.36754	0.0254152	0.352158	-3.43796
ISLR	-0.661674	4.78928	2.36476	0.0255724	0.352986	-3.44304
SFTPC	-1.98451	7.49024	2.3474	0.0265756	0.358284	-3.4747
CFH	-0.667175	5.85439	2.34486	0.0267253	0.358586	-3.47931
NEDD9	-0.764469	5.91129	2.34328	0.0268183	0.358612	-3.48217
NINJ2	-0.588856	4.60875	2.33157	0.0275209	0.361265	-3.50342
SLC16A4	-0.985731	2.5649	2.32641	0.0278359	0.362594	-3.51276
PRSS8	-0.677924	5.91629	2.32058	0.0281957	0.362997	-3.5233
PDLIM3	-0.658854	5.06408	2.30489	0.0291844	0.36603	-3.55157
LOC101928830	-0.597251	7.78412	2.28644	0.0303879	0.371846	-3.58466
SERPIND1	-0.643546	2.88953	2.27294	0.0312962	0.378241	-3.60876
ALOX5	-0.694933	5.59326	2.26559	0.0318014	0.379719	-3.62185
CHI3L1	-1.18345	5.21907	2.23181	0.0342191	0.386389	-3.68163
ZNF24	-0.626501	4.58491	2.22277	0.0348932	0.389379	-3.69752
EHF	-0.606123	2.99782	2.22255	0.0349105	0.389379	-3.69793
S100A10	-0.677056	9.3998	2.20166	0.0365156	0.396851	-3.73449
SLCO3A1	-0.692194	4.56051	2.20004	0.0366432	0.396851	-3.73733
ST3GAL5	-0.659107	6.09443	2.19115	0.0373478	0.399381	-3.7528
CXCL3	-0.886381	3.26521	2.18119	0.0381525	0.403408	-3.7701
TGFBI	-0.595703	7.89762	2.17274	0.0388481	0.408217	-3.78475
RNASE1	-0.759756	7.96491	2.16231	0.0397209	0.411104	-3.80276
NDN	-0.659023	5.59102	2.16113	0.0398215	0.411311	-3.80481
TGM2	-0.58938	5.98564	2.12019	0.0434298	0.420649	-3.87492
SLC2A3	-0.840906	5.29013	2.11275	0.0441162	0.422626	-3.88756
RARRES2	-0.68893	5.93612	2.10089	0.0452301	0.422705	-3.90765
TKT	-0.674581	6.76222	2.10004	0.0453114	0.422705	-3.9091
INHBA	-0.828578	5.04993	2.09706	0.0455954	0.422705	-3.91413
PRSS3	-0.82864	4.34699	2.09405	0.0458842	0.422705	-3.91921
SERPINE1	-0.629564	4.80966	2.06984	0.0482672	0.428405	-3.9599
ABCC3	-0.837329	5.82267	2.06113	0.0491505	0.43025	-3.97445
C1QA	-0.682765	6.7722	2.05823	0.0494477	0.43025	-3.97929
IL6	-0.731029	4.86895	2.05302	0.0499864	0.43034	-3.98797
RBBP4	1.01616	5.45916	-5.32829	1.30465e-05	0.056223	3.01788
SNRNP40	0.6644	5.35882	-4.72199	6.58945e-05	0.0638096	1.63873
TRA2A	0.785865	5.19749	-4.44187	0.000139244	0.094134	0.997653
DNAJA2	0.683342	4.89943	-4.36112	0.000172669	0.094134	0.812983
F2R	1.0486	3.89568	-4.34415	0.000180653	0.094134	0.774174
KRIT1	1.16127	3.28079	-4.25792	0.000227207	0.096498	0.577233
STT3A	0.94605	6.19094	-4.22139	0.000250348	0.096498	0.493893
HIST1H4A	1.03692	-0.966344	-4.10419	0.000341494	0.107254	0.227033
GLUD1	0.706967	6.29818	-4.08382	0.000360388	0.107469	0.180738
MSMB	2.75204	5.38309	-4.0764	0.000367525	0.107469	0.163877
RBBP5	0.704386	3.14417	-4.01494	0.000432247	0.11824	0.0244146
CEPT1	0.749187	4.82564	-3.97284	0.000482925	0.127975	-0.0709102
RANBP1	1.0157	5.99206	-3.94069	0.00052554	0.134143	-0.143622
CKAP4	0.72724	5.63708	-3.93092	0.000539207	0.134143	-0.165696
GLG1	0.65254	5.55446	-3.87305	0.000627605	0.134143	-0.296219
SMAD4	0.800829	3.6208	-3.82527	0.000711202	0.134143	-0.403719
AASDHPPT	0.840792	5.44883	-3.81725	0.000726273	0.134143	-0.421746
FZD6	1.29663	4.94007	-3.81651	0.000727661	0.134143	-0.423386
ZDHHC13	0.801896	4.46466	-3.79982	0.00076009	0.13714	-0.460865
ACTR2	0.770142	6.57897	-3.75666	0.000850642	0.14144	-0.557602
CLDND1	0.900663	4.7228	-3.7192	0.000937706	0.141994	-0.641335
NAP1L1	0.736134	5.35349	-3.6115	0.00123952	0.160273	-0.881003
YBX3	0.792591	7.74249	-3.59234	0.00130235	0.160273	-0.923448
NUTF2	0.640025	6.03635	-3.58912	0.0013132	0.160273	-0.930573
CD164	0.932303	5.8644	-3.58623	0.00132301	0.160273	-0.936961
SRPK2	1.06531	4.59403	-3.56917	0.00138248	0.161361	-0.974694
PTGES3	0.708965	7.79354	-3.56789	0.00138701	0.161361	-0.977507
CHIC2	0.625697	5.03962	-3.56732	0.00138907	0.161361	-0.97878
NUP50	0.865024	4.24921	-3.53366	0.00151467	0.169005	-1.05305
SERPINB3	2.25987	4.2619	-3.42393	0.00200551	0.191087	-1.2937
TMED2	0.692163	2.71391	-3.41284	0.00206298	0.192243	-1.3179
PTK2	0.588749	4.14118	-3.39159	0.0021775	0.196439	-1.36417
SRSF3	0.690175	4.93585	-3.38417	0.00221895	0.196851	-1.38032
PPIB	0.717304	7.28445	-3.37761	0.00225622	0.196851	-1.39458
CPA3	0.838441	6.13115	-3.33183	0.00253363	0.196851	-1.49382
RYK	0.764916	5.17212	-3.2847	0.00285353	0.212262	-1.59549
B3GNT2	0.619173	4.2401	-3.27522	0.00292244	0.21364	-1.61589
GNB1	0.676797	5.34854	-3.21376	0.00340959	0.230809	-1.74756
CNN3	0.936518	5.94098	-3.20835	0.00345598	0.230809	-1.75909
SCGB1A1	1.74562	5.82714	-3.1682	0.00382006	0.230809	-1.84454
MIR4680	0.635182	4.30323	-3.16406	0.00385968	0.230809	-1.85333
SRSF1	0.640772	5.96465	-3.16313	0.00386863	0.230809	-1.85531
KDELR1	0.627222	5.53544	-3.16142	0.00388515	0.230809	-1.85894
RBM3	0.767202	5.78931	-3.13912	0.00410648	0.230809	-1.90616
EIF2S3	0.996731	4.48798	-3.12884	0.00421263	0.233843	-1.9279
STX16	0.608751	4.72287	-3.10824	0.00443312	0.237162	-1.97135
S100A2	1.77172	6.95049	-3.07379	0.0048268	0.242197	-2.04376
MMP10	1.88698	3.96709	-3.05784	0.00502027	0.245264	-2.07718
TAF2	0.656086	5.10654	-3.03701	0.00528397	0.245264	-2.1207
P4HA1	0.796192	6.66438	-3.0241	0.005454	0.247233	-2.1476
LRRFIP1	0.587685	5.95248	-2.96955	0.00623171	0.256615	-2.26075
G3BP1	0.816617	5.54825	-2.93918	0.00670931	0.267876	-2.32334
HOOK1	0.876034	3.35295	-2.89943	0.00738706	0.27001	-2.40482
CYBB	0.919907	4.57041	-2.88228	0.00769898	0.270208	-2.4398
CCND1	0.723731	6.02676	-2.87874	0.00776499	0.270598	-2.44702
CYBA	1.06741	6.4707	-2.87114	0.00790836	0.270598	-2.46248
MLF1	0.674517	3.76156	-2.8481	0.00835849	0.276227	-2.50925
TMX1	0.734222	4.11413	-2.7979	0.00942435	0.281118	-2.61051
GMCL1	0.672706	4.709	-2.79738	0.00943613	0.281118	-2.61156
SORD	0.765795	5.64666	-2.77263	0.010008	0.281118	-2.66113
LGALS7	0.828558	4.3668	-2.76767	0.0101266	0.281118	-2.67105
ERO1L	0.688379	5.10385	-2.76582	0.0101712	0.281118	-2.67475
MYC	0.777643	5.16195	-2.76143	0.0102777	0.281439	-2.68351
SPAG6	0.809809	3.88931	-2.75	0.0105598	0.284582	-2.70629
HIRA	0.807977	4.10932	-2.74732	0.0106269	0.285177	-2.71162
SMARCC1	0.654859	3.94629	-2.64802	0.0134179	0.294851	-2.90732
YWHAZ	0.622573	8.39112	-2.60597	0.0147949	0.306002	-2.98902
HSPA1A	0.585403	2.23864	-2.5817	0.0156484	0.310388	-3.03585
NFE2L2	0.787503	6.22278	-2.5693	0.0161019	0.314618	-3.05968
LY6D	0.923316	3.50843	-2.51717	0.0181454	0.323872	-3.15915
SLC16A1	0.615645	4.59551	-2.50878	0.0184957	0.323872	-3.17504
SLC38A2	0.709899	7.20839	-2.43129	0.0220411	0.340331	-3.32042
TPPP3	0.693464	4.62382	-2.42114	0.0225492	0.340331	-3.33926
IGJ	1.0459	6.31493	-2.40065	0.023608	0.344173	-3.37716
DHRS9	0.880791	5.18255	-2.39883	0.0237038	0.344192	-3.3805
TP63	1.03074	4.60049	-2.37864	0.0247954	0.349214	-3.41762
ATP2B1	0.614173	4.00537	-2.35368	0.0262084	0.356141	-3.46325
DSP	0.847708	7.72773	-2.30635	0.029091	0.36603	-3.54894
DST	0.98935	3.12267	-2.2884	0.0302575	0.371202	-3.58114
KCTD3	0.713211	3.30057	-2.27967	0.0308404	0.375294	-3.59676
PCYOX1	0.65266	2.60687	-2.26507	0.0318373	0.379719	-3.62277
HSPH1	0.611677	6.5591	-2.25244	0.0327234	0.380504	-3.64519
TSPAN1	1.06156	6.46379	-2.24363	0.0333549	0.382747	-3.66078
SPAG1	0.600392	3.30204	-2.18325	0.0379851	0.403146	-3.76654
RAD51AP1	0.619933	4.40854	-2.14354	0.0413378	0.416244	-3.83505
MRPS12	0.660789	5.06484	-2.13729	0.0418889	0.416564	-3.84575
MAD2L1	0.66265	4.79017	-2.13725	0.041892	0.416564	-3.84581
KRT5	1.16514	5.38863	-2.12937	0.0425966	0.418078	-3.85928
KRT13	1.24524	3.77118	-2.1222	0.0432458	0.420127	-3.87149
RARRES1	1.0565	5.83909	-2.08457	0.0468041	0.425401	-3.93517
GSTA1	0.990235	5.27948	-2.08128	0.0471277	0.426383	-3.94071
UPK1B	0.709104	4.21709	-2.07926	0.0473274	0.426383	-3.94411
SOX9	0.719914	5.05238	-2.07903	0.0473495	0.426383	-3.94449
TNFRSF21	0.592875	5.13326	-2.07822	0.0474295	0.426383	-3.94584
SLC44A4	0.590396	5.10505	-2.06926	0.0483251	0.428405	-3.96086
